# Supplementary material
Source: Springer Nature journal article supplement (https://www.springermedizin.de/resource/supplementary/12936_2012_2126_MOESM9_ESM.pdf/9542656)

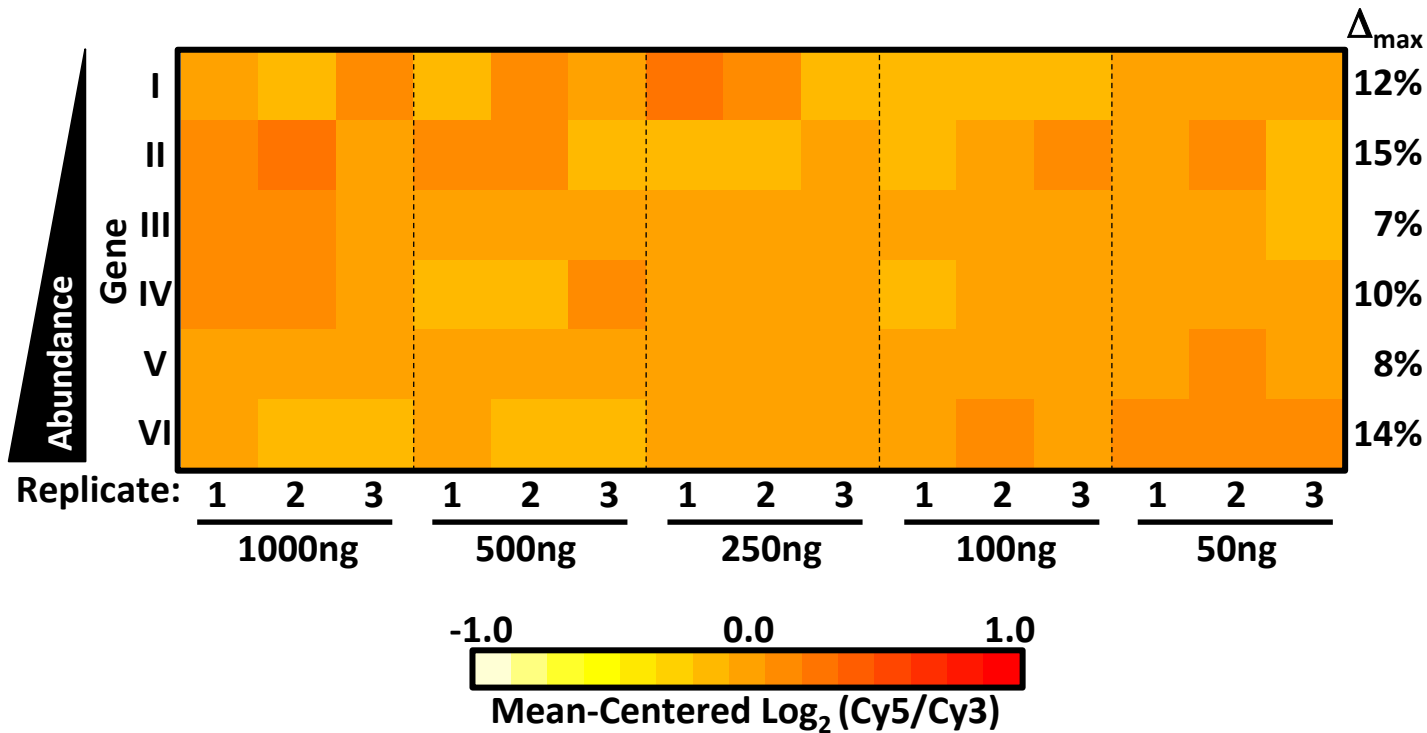

Supplement: MOESM9 [file 9542656]
